# Supplementary material for: Conductive biocomposite hydrogels with multiple biophysical cues regulate schwann cell behaviors
Source: Royal Society of Chemistry journal article supplement (doi:10.1039/d1tb02361f), 2022-01-01
Supplement: d1tb02361f1.pdf [file d1tb02361f1.pdf]

## Supplementary Information

### Conductive Biocomposite Hydrogels with Multiple Biophysical Cues Regulate Schwann

#### Cell Behaviors

Yahong Zhao <sup>a,1,\*</sup>, Jina Liu <sup>a,1</sup>, Yisheng Gao <sup>a</sup>, Zhixin Xu <sup>a</sup>, Chaolun Dai <sup>b</sup>, Guicai Li <sup>a</sup>, Cheng Sun <sup>a</sup>, Yumin Yang <sup>a,\*</sup>, Kunyu Zhang <sup>c,d,e,f,\*</sup>

**Table S1.** Primer sequences used for RT-qPCR analysis.

| Gene | Forward Primer       | Reverse Primer       |
|------|----------------------|----------------------|
| 18S  | TCTATTTTGTGGTTTTTCGG | ATGCTTTCGCTCTGGTTC   |
| NGF  | GTTTAGCACCCAGCCTCC   | GGTCTTATCTCCAACCCACA |
| BDNF | TGACAGTATTAGCGAGTGGG | ATTGGGTAGTTCGGCATT   |
| CNTF | CTGTAGCCGTTCTATCTGG  | GGTAAGCCTGGAGGTTCT   |

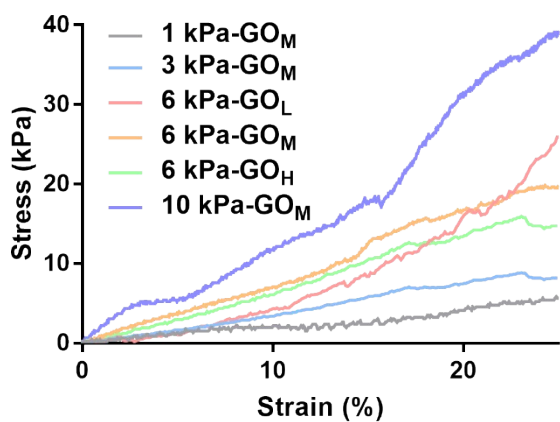

**Fig. S1.** Representative stress-strain curves of the SF/GO biocomposite hydrogels.

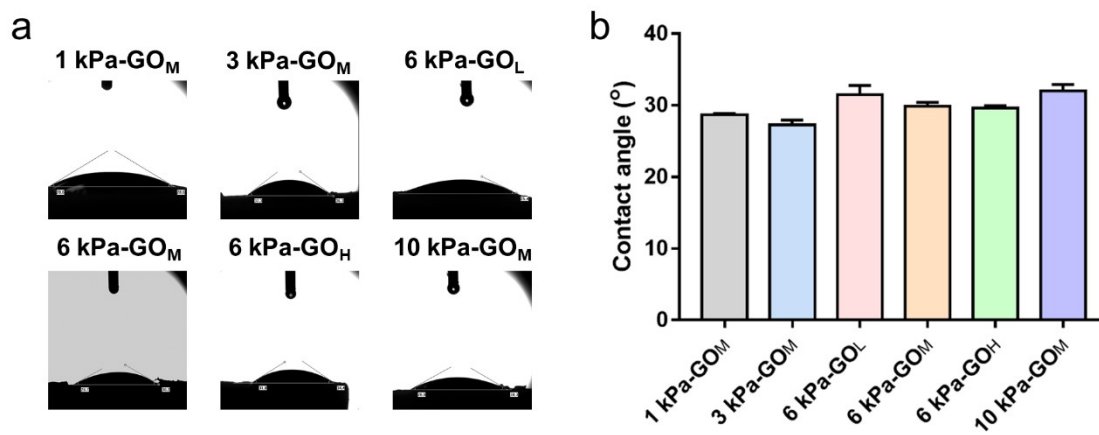

**Fig. S2.** a) Photographs of water contact angles of the SF/GO biocomposite hydrogels. b)

Water contact angles of the SF/GO biocomposite hydrogels.
